# Supplementary material for: Large-Area Fabrication of Structurally Colored and Humidity Sensitive Composite Nanofilm via Ultrasonic Spray-Coating
Source: MDPI journal article supplement (doi:10.3390/polym13213768), 2021-10-30
Supplement: s1 [file s1]

## Supplementary Information

### Large-area fabrication of structurally colored and humidity sensitive SiO<sub>2</sub> nanofilm via ultrasonic spray-coating

Sijun Li, Donghui Kou, Shufen Zhang, and Wei Ma\*

State Key Laboratory of Fine Chemicals, Dalian University of Technology, Dalian, Liaoning 116023, P. R. China.

E-mail: weima@dlut.edu.cn; Tel: +86-411-84986265.

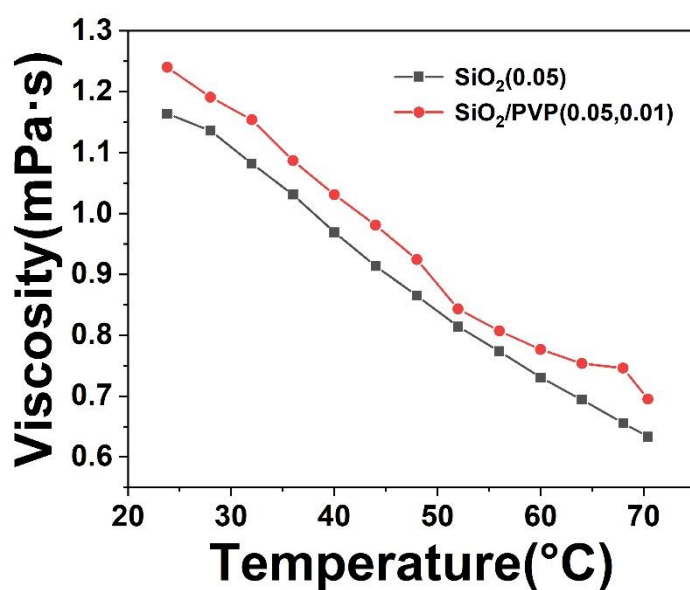

**Figure S1.** Viscosity of the spray solutions at different temperatures.

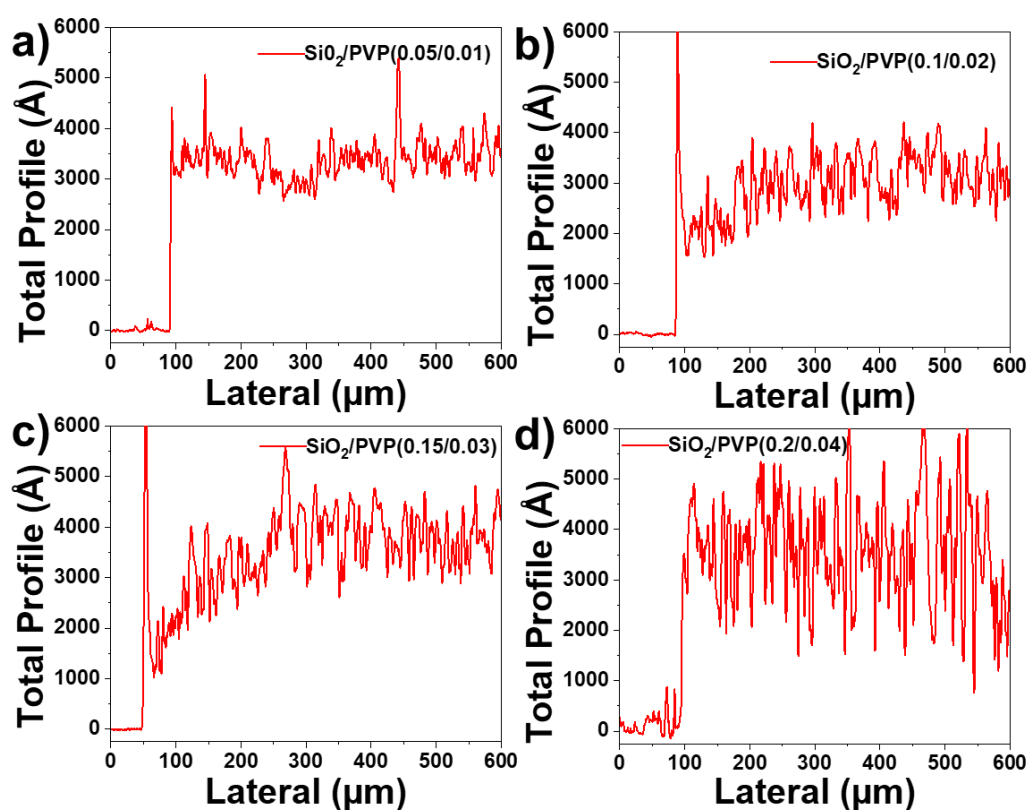

**Figure S2.** Film surface profile of spraying at (a)  $\text{SiO}_2/\text{PVP}$  (0.05/0.01), (b)  $\text{SiO}_2/\text{PVP}$  (0.10/0.02), (c)  $\text{SiO}_2/\text{PVP}$  (0.15/0.03) and (d)  $\text{SiO}_2/\text{PVP}$  (0.20/0.04) at  $T = 50^\circ\text{C}$ .

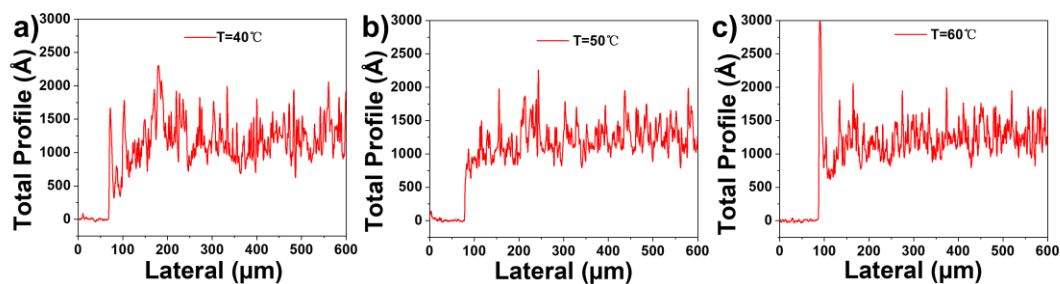

**Figure S3.** Film surface profile at (a)  $T = 40^\circ\text{C}$ , (b)  $50^\circ\text{C}$  and (c)  $60^\circ\text{C}$  at  $\text{SiO}_2/\text{PVP}$  (0.05/0.01) and  $H = 60\text{ mm}$ .

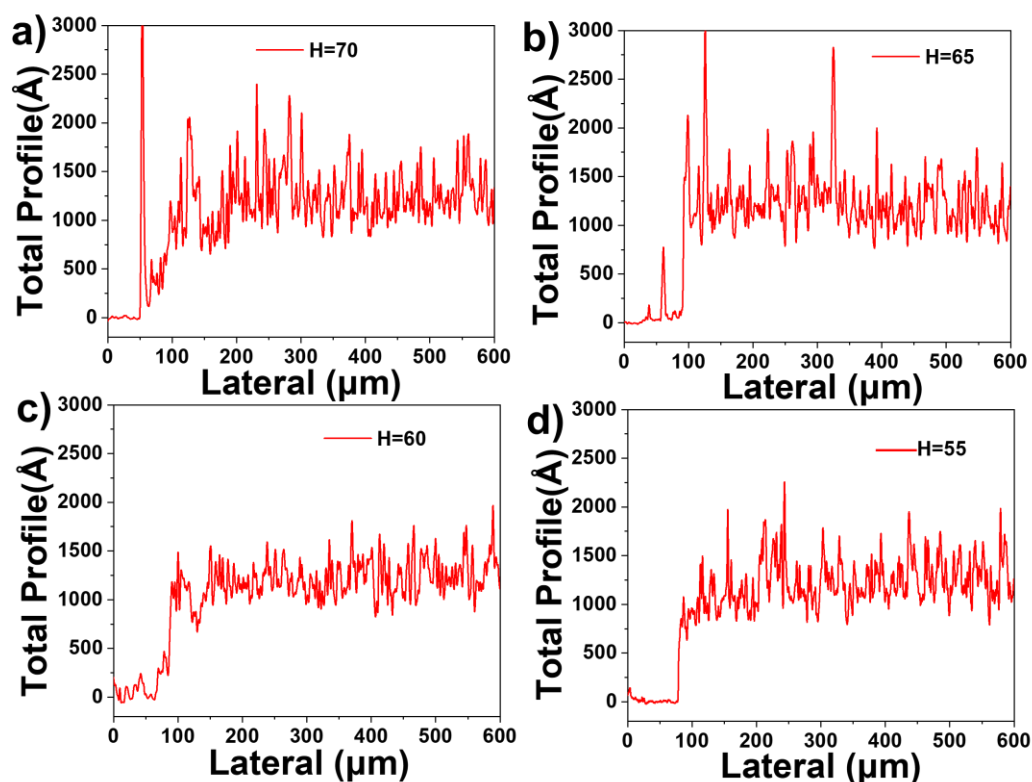

**Figure S4.** Film surface profile at (a) H = 70, (b) H = 65, (c) H = 60 and (d) H = 55 mm, at SiO<sub>2</sub>/PVP (0.05/0.01) and T = 50 °C.

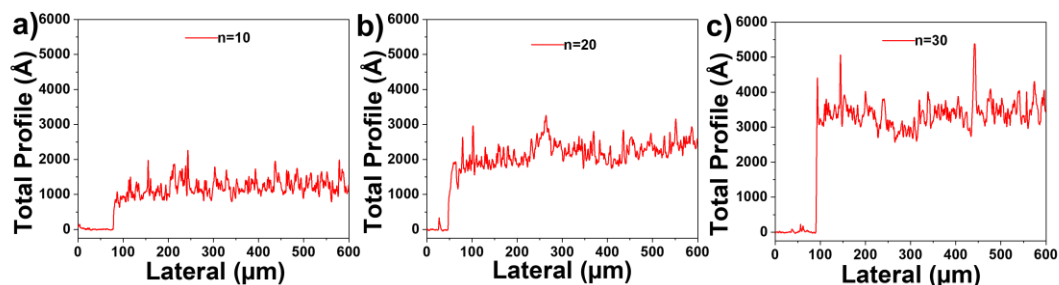

**Figure S5.** Film surface profile of spray passes at (a) N = 10, (b) N = 20, and (c) N = 30, at SiO<sub>2</sub>/PVP (0.05/0.01), T=50 °C and H = 60 mm.

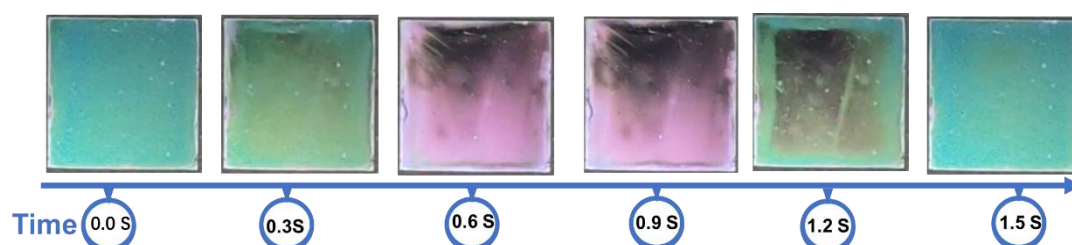

**Figure S6.** The response and recovery time of humidity sensing.

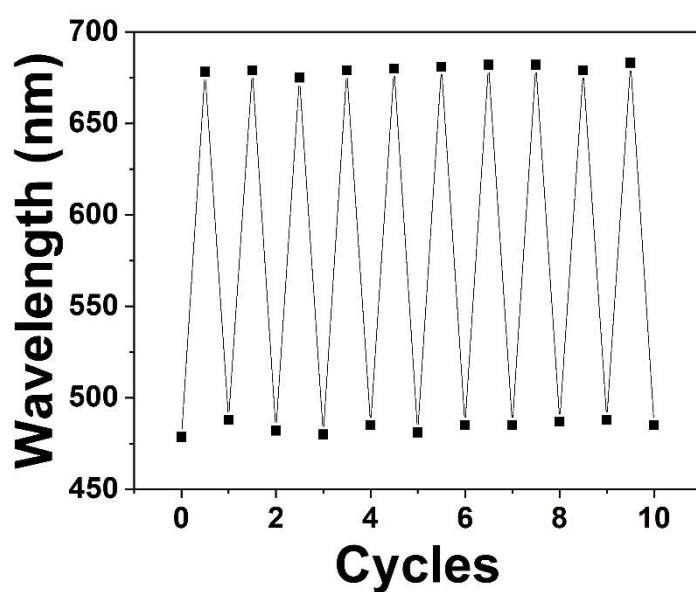

**Figure S7.** Recycle detection test of the structure color film in 33 % and 97 % relative humidity environment.

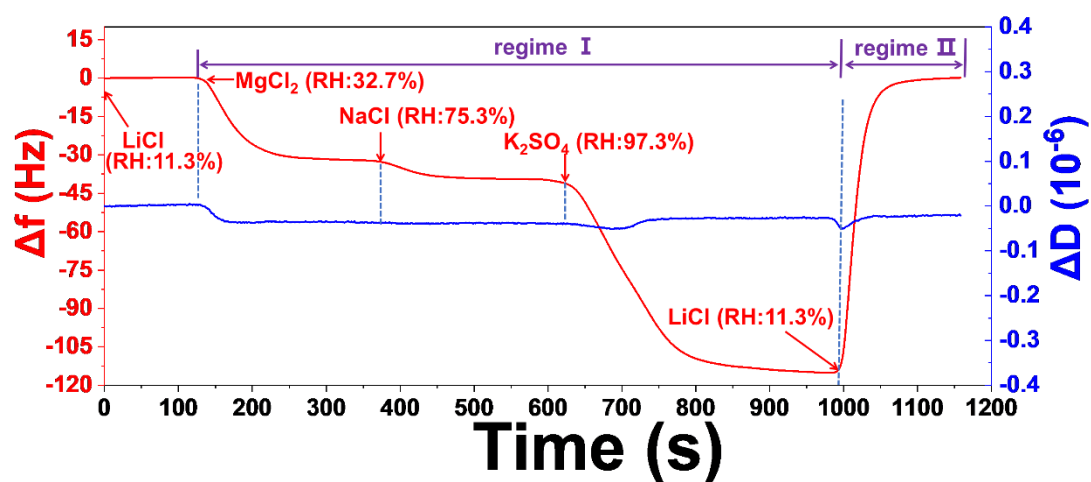

**Figure S8.** Variations of frequency and dissipation by spin-coating  $SiO_2/PVP$  on a gold-coated chip when exposed to different relative humidity conditions.

**Table S1.** Surface tension of the solutions.

| Solution                          | Surface tension (mN / m) |
|-----------------------------------|--------------------------|
| SiO <sub>2</sub> (0.05)           | 71.7                     |
| SiO <sub>2</sub> /PVP (0.05/0.01) | 68.8                     |

**Table S2.** Structure color film thickness.

| Spray pass | Thickness (nm) |
|------------|----------------|
| 20         | 225.6          |
| 22         | 248.3          |
| 24         | 270.1          |
| 26         | 295.4          |
| 28         | 313.4          |
| 30         | 337.2          |
