# Supplementary material for: Large-Area Fabrication of Structurally Colored and Humidity Sensitive Composite Nanofilm via Ultrasonic Spray-Coating
Source: Polymers (Basel). 2021 Oct 30;13(21):3768. doi: 10.3390/polym13213768 (PMC8587582; doi:10.3390/polym13213768)
Supplement: Supplementary file 1 [file polymers-13-03768-s001.zip]

Archive with 4 entries (4 files):
- Supplementary Information-Wei Ma.pdf
- Video S1.mp4
- Video S2.mp4
- Video S3.mp4
